# Supplementary material for: Exposure-response relationship between hand-arm vibration exposure and vibrotactile thresholds among rock drill operators: a 4-year cohort study
Source: HighWire-hosted journal article supplement (doi:10.1136/oemed-2022-108293), 2022-07-08
Supplement: oemed-2022-108293supp001_data_supplement.pdf [file oemed-2022-108293supp001_data_supplement.pdf]

## SUPPLEMENTARY MATERIAL

**Table 5** Mixed models: Associations between last 12 months of HAV exposure from rock drills and pegboard score using dominant hand; coefficients represent increase of performance time in the pegboard test (seconds) per tenfold increase in last 12-months exposure before tests ( $h \cdot ms^{-2}$ )

| Age (years)         | Coefficient | 95% Confidence Interval |
|---------------------|-------------|-------------------------|
| 20-29               | 1 REF       |                         |
| 30-39               | -0.08       | -3.25 to 3.03           |
| 40-49               | 4.89        | 1.81 to 7.98*           |
| 50-59               | 9.73        | 6.21 to 13.25*          |
| 60-69               | 15.21       | 10.55 to 19.88*         |
| Rock drill exposure |             |                         |
| Last year           | -0.72       | -1.45 to -0.21          |
| Constant            | 57.06       | 54.72 to 59.40*         |

\*Significant at  $p \leq 0.05$

**Table 6.** Results summary from mixed models at dominant and non-dominant 2<sup>nd</sup> and 5<sup>th</sup> fingers at seven test-frequencies: Associations between lifetime cumulative HAV exposure from impact wrenches and VPT; coefficients represent increase of VPT (dB) per tenfold increase in lifetime cumulative exposure ( $h \cdot ms^{-2}$ )<sup>ab</sup>

| Frequency | Dominant 2 <sup>nd</sup> finger<br>(n=147, number of obs = 248) <sup>c d</sup> | Dominant 5 <sup>th</sup> finger<br>(n=146, number of obs = 244) <sup>c d</sup> | Non-dominant 2 <sup>nd</sup> finger<br>(n=144, number of obs = 242) <sup>c d</sup> | Non-dominant 5 <sup>th</sup> finger<br>(n=147, number of obs = 246) <sup>c d</sup> |
|-----------|--------------------------------------------------------------------------------|--------------------------------------------------------------------------------|------------------------------------------------------------------------------------|------------------------------------------------------------------------------------|
| Hz        | Coefficients (95 % CI) <sup>e</sup>                                            |                                                                                |                                                                                    |                                                                                    |
| 8         | 0.26 (-0.49 to 1.00)                                                           | 0.17 (-0.62 to 0.96)                                                           | 0.10 (-0.60 to 0.79)                                                               | 0.04 (-0.73 to 0.81)                                                               |
| 16        | 0.65 (-0.09 to 1.39)                                                           | 0.21 (-0.56 to 0.98)                                                           | 0.22 (-0.58 to 1.03)                                                               | 0.34 (-0.40 to 1.09)                                                               |
| 32        | 0.05 (-0.64 to 0.74)                                                           | 0.17 (-0.62 to 0.96)                                                           | 0.26 (-0.52 to 1.04)                                                               | 0.16 (-0.63 to 0.96)                                                               |
| 64        | 0.14 (-0.76 to 1.15)                                                           | 0.59 (-0.30 to 1.49)                                                           | 0.46 (-0.51 to 1.44)                                                               | 0.09 (-0.87 to 1.05)                                                               |
| 125       | 0.21 (-0.76 to 1.17)                                                           | 0.14 (-0.94 to 1.22)                                                           | 0.70 (-0.30 to 1.71)                                                               | 0.29 (-0.91 to 1.48)                                                               |
| 250       | 0.11 (-0.98 to 1.20)                                                           | -0.14 (-1.50 to 1.23)                                                          | 0.20 (-1.01 to 1.41)                                                               | 0.47 (-0.87 to 1.81)                                                               |
| 500       | -0.47 (-1.62 to 0.68)                                                          | 0.23 (-1.29 to 1.74)                                                           | 0.46 (-0.98 to 1.90)                                                               | 0.55 (-0.91 to 2.02)                                                               |

\*  $p \leq 0.05$

<sup>a)</sup> Log10-transformed exposure was used in models adjusted for age in 10-year intervals.

<sup>b)</sup> HAV exposure was calculated as lifetime cumulative exposure at each VPT-test. Subject ID was used as random intercept in linear mixed models

<sup>c)</sup> Each subject was tested for VPT 1 – 3 three times (mean 1.7 times) with approx. two years between each test.

<sup>d)</sup> The number of participants is less than the total of n=148 for each tested finger because of participants having injured or missing fingertips

<sup>e)</sup> Impact wrench exposure was adjusted for rock drill exposure in the models

**Table 7.** Results summary from mixed models at dominant and non-dominant 2<sup>nd</sup> and 5<sup>th</sup> fingers at seven test-frequencies: Associations between HAV exposure from impact wrenches and VPT; coefficients represent increase of VPT (dB) per tenfold increase in last 12-months exposure before tests ( $h \cdot ms^{-2}$ )<sup>ab</sup>

| Frequency | Dominant 2 <sup>nd</sup> finger<br>(n=147, number of obs = 248) <sup>c,d</sup> | Dominant 5 <sup>th</sup> finger<br>(n=146, number of obs = 244) <sup>c,d</sup> | Non-dominant 2 <sup>nd</sup> finger<br>(n=144, number of obs = 242) <sup>c,d</sup> | Non-dominant 5 <sup>th</sup> finger<br>(n=147, number of obs = 246) <sup>c,d</sup> |
|-----------|--------------------------------------------------------------------------------|--------------------------------------------------------------------------------|------------------------------------------------------------------------------------|------------------------------------------------------------------------------------|
| Hz        | Coefficients (95 % CI) <sup>e</sup>                                            |                                                                                |                                                                                    |                                                                                    |
| 8         | -0.44 (-1.29 to 0.41)                                                          | -0.46 (-1.39 to 0.47)                                                          | -0.40 (-1.22 to 0.43)                                                              | -0.45 (-1.35 to 0.44)                                                              |
| 16        | 0.08 (-0.76 to 0.92)                                                           | -0.35 (-1.24 to 0.55)                                                          | -0.27 (-1.22 to 0.68)                                                              | 0.08 (-0.79 to 0.96)                                                               |
| 32        | 0.05 (-0.72 to 0.83)                                                           | -0.07 (-0.99 to 0.86)                                                          | -0.05 (-0.95 to 0.84)                                                              | 0.05 (-0.88 to 0.97)                                                               |
| 64        | 0.16 (-0.85 to 1.18)                                                           | 0.29 (-0.76 to 1.35)                                                           | 0.61 (-0.51 to 1.75)                                                               | 0.38 (-0.73 to 1.49)                                                               |
| 125       | 0.28 (-0.83 to 1.39)                                                           | -0.38 (-1.70 to 0.93)                                                          | 0.08 (-1.11 to 1.26)                                                               | 0.39 (-1.01 to 1.79)                                                               |
| 250       | -0.21 (-1.47 to 1.06)                                                          | -0.39 (-1.99 to 1.21)                                                          | -0.45 (-1.87 to 0.98)                                                              | 0.23 (-1.39 to 1.84)                                                               |
| 500       | -0.21 (-1.54 to 1.13)                                                          | 0.22 (-1.58 to 2.01)                                                           | 0.16 (-1.48 to 1.80)                                                               | 0.45 (-1.31 to 2.22)                                                               |

\*  $p \leq 0.05$

a) Log<sub>10</sub>-transformed exposure was used in models adjusted for age in 10-year intervals.

b) HAV exposure was calculated as average exposure during the last year before the VPT-test. Subject ID was used as random intercept in linear mixed models

c) Each subject was tested for VPT 1 – 3 three times (mean 1.7 times) with approx. two years between each test.

d) The number of participants is less than the total of n=148 for each tested finger because of participants having injured or missing fingertips

e) Impact wrench exposure was adjusted for rock drill exposure in the models

**Table 8.** Mixed models: Associations between lifetime cumulative HAV exposure from rock drills and pegboard score using non-dominant hand; coefficients represent increase of performance time in the pegboard test (seconds) per tenfold increase in lifetime cumulative exposure ( $\text{h} \cdot \text{ms}^{-2}$ )

| Age (years)         | Coefficient | 95% Confidence Interval |
|---------------------|-------------|-------------------------|
| 20-29               | 1 REF       |                         |
| 30-39               | 2.64        | -1.76 to 6.84           |
| 40-49               | 6.37        | 2.27 to 10.47*          |
| 50-59               | 10.70       | 5.85 to 15.43*          |
| 60-69               | 21.8        | 15.72 to 27.92*         |
| Rock drill exposure |             |                         |
| Lifetime cumulative | -0.60       | -1.38 to 0.18           |
| Constant            | 61.4        | 58.3 to 64.5 *          |

\*Significant at  $p \leq 0.05$

**Table 9.** Mixed models: Associations between last 12-months HAV exposure from rock drills and pegboard score using non-dominant hand; coefficients represent increase of performance time in the pegboard test (seconds) per tenfold increase in exposure last year ( $\text{h} \cdot \text{ms}^{-2}$ )

| Age (years)         | Coefficient | 95% Confidence Interval |
|---------------------|-------------|-------------------------|
| 20-29               | 1 REF       |                         |
| 30-39               | 2.72        | -1.43 to 6.86           |
| 40-49               | 6.26        | 2.22 to 10.31*          |
| 50-59               | 10.36       | 5.62 to 15.10*          |
| 60-69               | 21.2        | 15.07 to 27.24*         |
| Rock drill exposure |             |                         |
| Last year           | -0.98       | -1.92 to -0.04*         |
| Constant            | 61.7        | 58.7 to 64.7 *          |

\*Significant at  $p \leq 0.05$

**Table 10.** Mixed models: Associations between lifetime cumulative HAV exposure from impact wrenches and pegboard score using dominant hand; coefficients represent increase of performance time in the pegboard test (seconds) per tenfold increase in lifetime cumulative exposure ( $\text{h} \cdot \text{ms}^{-2}$ )

| Age (years)            | Coefficient | 95% Confidence Interval |
|------------------------|-------------|-------------------------|
| 20-29                  | 1 REF       |                         |
| 30-39                  | -0.25       | -3.45 to 2.93           |
| 40-49                  | 4.84        | 1.67 to 8.00*           |
| 50-59                  | 9.64        | 5.95 to 13.33*          |
| 60-69                  | 15.52       | 10.81 to 20.23*         |
| Impact wrench exposure |             |                         |
| Lifetime cumulative    | 0.42        | -0.32 to 1.16           |
| Constant               | 55.7        | 53.5 to 57.9 *          |

\*Significant at  $p \leq 0.05$

**Table 11.** Mixed models: Associations between lifetime cumulative HAV exposure from impact wrenches and pegboard score using non-dominant hand; coefficients represent increase of performance time in the pegboard test (seconds) per tenfold increase in lifetime cumulative exposure ( $\text{h} \cdot \text{ms}^{-2}$ )

| Age (years)            | Coefficient | 95% Confidence Interval |
|------------------------|-------------|-------------------------|
| 20-29                  | 1 REF       |                         |
| 30-39                  | 2.64        | -1.59 to 6.87           |
| 40-49                  | 6.92        | 2.73 to 11.11*          |
| 50-59                  | 11.53       | 6.54 to 16.52*          |
| 60-69                  | 22.57       | 16.36 to 28.78*         |
| Impact wrench exposure |             |                         |
| Lifetime cumulative    | -0.30       | -1.25 to 0.66           |
| Constant               | 60.6        | 57.7 to 63.5 *          |

\*Significant at  $p \leq 0.05$

**Table 12.** Mixed models: Associations between last 12-months exposure from impact wrenches and pegboard score using dominant hand; coefficients represent increase of performance time in the pegboard test (seconds) per tenfold increase in exposure last 12 months ( $\text{h} \cdot \text{ms}^{-2}$ )

| Age (years)            | Coefficient | 95% Confidence Interval |
|------------------------|-------------|-------------------------|
| 20-29                  | 1 REF       |                         |
| 30-39                  | -0.29       | -3.49 to 2.92           |
| 40-49                  | 4.90        | 1.71 to 9.10*           |
| 50-59                  | 9.90        | 6.25 to 13.56*          |
| 60-69                  | 15.85       | 11.20 to 20.50*         |
| Impact wrench exposure |             |                         |
| Last year              | -0.41       | -0.64 to 1.45           |
| Constant               | 55.9        | 53.8 to 58.0 *          |

\*Significant at  $p \leq 0.05$

**Table 13** Mixed models: Associations between last 12-months HAV exposure from impact wrenches and pegboard score using non-dominant hand; coefficients represent increase of performance time in the pegboard test (seconds) per tenfold increase in exposure last 12 months ( $\text{h} \cdot \text{ms}^{-2}$ )

| Age (years)            | Coefficient | 95% Confidence Interval |
|------------------------|-------------|-------------------------|
| 20-29                  | 1 REF       |                         |
| 30-39                  | 2.53        | -1.71 to 6.77           |
| 40-49                  | 6.52        | 2.30 to 10.74*          |
| 50-59                  | 10.91       | 5.96 to 15.85*          |
| 60-69                  | 22.16       | 16.03 to 28.29*         |
| Impact wrench exposure |             |                         |
| Last year              | 0.19        | -1.18 to 1.57           |
| Constant               | 60.3        | 57.5 to 63.1 *          |

\*Significant at  $p \leq 0.05$
